# Supplementary material for: Safety, Pharmacokinetics, and Pharmacodynamics of Single and Multiple Luseogliflozin Dosing in Healthy Japanese Males: A Randomized, Single-Blind, Placebo-Controlled Trial
Source: Springer Nature journal article supplement (doi:10.1007/s12325-014-0102-3), 2014-02-17
Supplement: MOESM1 [file 9203260]

- This is the first in-human study of luseogliflozin, a sodium glucose cotransporter 2 inhibitor, which is developed for the treatment of diabetes mellitus.
- Randomized, single-blind, placebo-controlled, single ascending dose (1 to 25 mg) and multiple ascending dose (5 or 10 mg, 7 days) studies were conducted in healthy male Japanese subjects.
- The maximum plasma level and area under the concentration-time curve of luseogliflozin were dose-dependent and not affected by food intake.
- Urinary glucose excretion increased in a dose-dependent manner, reached to 70.9 and 76.9 g/day in the single-dose and multiple-dose study, respectively.
- Luseogliflozin was well tolerated and showed favorable pharmacokinetic and pharmacodynamic profiles in healthy male Japanese subjects.

This summary slide represents the opinions of the authors. Sponsorship for this study was funded by Taisho Pharmaceutical Co., Ltd., Tokyo, Japan. Medical writing assistance for this study was provided by Taisho Pharmaceutical Co., Ltd., Tokyo, Japan. For a full list of acknowledgments and conflicts of interest for all authors of this article, please see the full text online. Copyright © The Author(s) 2014. Creative Commons Attribution Noncommercial License (CC BY-NC).
